# Supplementary material for: High Resolution Mapping of RphMBR1012 Conferring Resistance to Puccinia hordei in Barley (Hordeum vulgare L.)
Source: Front Plant Sci. 2019 May 22;10:640. doi: 10.3389/fpls.2019.00640 (PMC6541035; doi:10.3389/fpls.2019.00640)
Supplement: Supplementary file 1 [file Table_1.xlsx]

## Sheet: Sheet1
Table S1. Marker type and primer sequence for 19 SNP markers from the 50K Infinium chip and from Genotyping-By-Sequencing (GBS) within an interval of 0.1 cM harbouring RphMBR1012
Markers	marker origin	Marker type	primer	Sequence
QBS114	50K Infinium chip	KASP	Common allele	CCAACCGGTATCCTTAAAGTCA
			Allele 1 (T)	GAAGGTGACCAAGTTCATGCTCCGTGTCCCGTACGCAT
			Allele 2 (C)	GAAGGTCGGAGTCAACGGATTCGTGTCCCGTACGCAC
QBS115	50K Infinium chip	KASP	Common allele	GGGAGACCTTCAAGCTGTGG
			Allele 1 (A)	GAAGGTGACCAAGTTCATGCTGAGGTTGAAGGTGTTCTGGTCA
			Allele 2 (G)	GAAGGTCGGAGTCAACGGATTGGTTGAAGGTGTTCTGGTCG
QBS116	50K Infinium chip	KASP	Common allele	TGCTGGGCTGTATACTGAATGA
			Allele 1 (T)	GAAGGTGACCAAGTTCATGCTCAGTTTTTGAACTGGAAAGTTTGTGTA
			Allele 2 (C)	GAAGGTCGGAGTCAACGGATTGTTTTTGAACTGGAAAGTTTGTGTG
QBS117	50K Infinium chip	KASP	Common allele	CCATTAGCAGGATCACCATT
			Allele 1 (G)	GAAGGTGACCAAGTTCATGCTACTTTGTACACGTTTGCTTATGTCC
			Allele 2 (A)	GAAGGTCGGAGTCAACGGATTCTTACTTTGTACACGTTTGCTTATGTCT
QBS118	GBS	KASP	Common allele	GACCGCTCGTATACCCTTGA
			Allele 1 (G)	GAAGGTGACCAAGTTCATGCTCGCTGCAGTGTCGGGTC
			Allele 2 (C)	GAAGGTCGGAGTCAACGGATTCGCTGCAGTGTCGGGTG
QBS119	GBS	KASP	Common allele	TCGGCAACTAACCTGATTCC
			Allele 1 (G)	GAAGGTGACCAAGTTCATGCTCATGCATGTTTAGTTTCCAATCTC
			Allele 2 (A)	GAAGGTCGGAGTCAACGGATTCATGCATGTTTAGTTTCCAATCTT
QBS120	GBS	KASP	Common allele	GGTAGATCACGACGCAACC
			Allele 1 (G)	GAAGGTGACCAAGTTCATGCTCAGCGGCGGCTCTCG
			Allele 2 (A)	GAAGGTCGGAGTCAACGGATTCAGCGGCGGCTCTCA
QBS121	GBS	KASP	Common allele	AGTCCCACTGTCTTAGGGTC
			Allele 1 (T)	GAAGGTGACCAAGTTCATGCTTTTAGATAGACTGCAGATGGATATAGAGAA
			Allele 2 (C)	GAAGGTCGGAGTCAACGGATTTTTAGATAGACTGCAGATGGATATAGAGAG
QBS122	GBS	KASP	Common allele	GGCATATTGAGACCATGCAC
			Allele 1 (G)	GAAGGTGACCAAGTTCATGCTTTGCCTTACCTAGGATGCAAAG
			Allele 2 (T)	GAAGGTCGGAGTCAACGGATTTTGCCTTACCTAGGATGCAAAT
QBS123	GBS	KASP	Common allele	ACAAGCAATCACAAGCCAGT
			Allele 1 (G)	GAAGGTGACCAAGTTCATGCTCACTCTGCAGGTTCTGTTTCG
			Allele 2 (A)	GAAGGTCGGAGTCAACGGATTCACTCTGCAGGTTCTGTTTCA
QBS124	GBS	KASP	Common allele	GCAGGGTGGGTACAACAGAA
			Allele 1 (A)	GAAGGTGACCAAGTTCATGCTCATAAGCAGCCACCAAGTTATGAT
			Allele 2 (C)	GAAGGTCGGAGTCAACGGATTAAGCAGCCACCAAGTTATGAG
QBS125	GBS	KASP	Common allele	AGTTTGAAGGTCTCCCAGCT
			Allele 1 (C)	GAAGGTCGGAGTCAACGGATTCAGTTCAGGTCCGTGACG
			Allele 2 (T)	GAAGGTGACCAAGTTCATGCTGCAGTTCAGGTCCGTGACA
QBS126	GBS	KASP	Common allele	TGGTTGATCCGATAGAGCTTG
			Allele 1 (G)	GAAGGTGACCAAGTTCATGCTATCGCCAACCGTCCCTC
			Allele 2 (A)	GAAGGTCGGAGTCAACGGATTATCGCCAACCGTCCCTT
QBS127	GBS	KASP	Common allele	CCCTATGGCCAATTCATTTC
			Allele 1 (T)	GAAGGTGACCAAGTTCATGCTCCACCCAAAACCTACAAGCA
			Allele 2 (C)	GAAGGTCGGAGTCAACGGATTCCACCCAAAACCTACAAGCG
QBS128	GBS	KASP	Common allele	ACGAGCGCACTGCAGAATTA
			Allele 1 (T)	GAAGGTGACCAAGTTCATGCTGCTCACACCATTGTCTTCTTCTTT
			Allele 2 (C)	GAAGGTCGGAGTCAACGGATTGCTCACACCATTGTCTTCTTCTTC
QBS129	GBS	KASP	Common allele	TGGCACGATACCGAAACC
			Allele 1 (G)	GAAGGTGACCAAGTTCATGCTGAACCCAAGGGTCCATTTTC
			Allele 2 (A)	GAAGGTCGGAGTCAACGGATTGAACCCAAGGGTCCATTTTT
QBS130	GBS	KASP	Common allele	GAGAGGTGCAGGCAGACG
			Allele 1 (A)	GAAGGTGACCAAGTTCATGCTCTGACATGTTGGGTGGGACT
			Allele 2 (T)	GAAGGTCGGAGTCAACGGATTTGACATGTTGGGTGGGACA
QBS131	GBS	KASP	Common allele	CACTCATCCACGCAGCAC
			Allele 1 (G)	GAAGGTGACCAAGTTCATGCTCCCATGTTAGACGCGACG
			Allele 2 (C)	GAAGGTCGGAGTCAACGGATTTCCCATGTTAGACGCGACC
QBS132	GBS	KASP	Common allele	CTTCGAACATGCCTCCAAAC
			Allele 1 (C)	GAAGGTGACCAAGTTCATGCTGAGGCTATAACTTGTTGTGAAACATTC
			Allele 2 (A)	GAAGGTCGGAGTCAACGGATTGAGGCTATAACTTGTTGTGAAACATTA
