# Supplementary material for: High Resolution Mapping of RphMBR1012 Conferring Resistance to Puccinia hordei in Barley (Hordeum vulgare L.)
Source: Front Plant Sci. 2019 May 22;10:640. doi: 10.3389/fpls.2019.00640 (PMC6541035; doi:10.3389/fpls.2019.00640)
Supplement: Supplementary file 3 [file Table_3.xlsx]

## Sheet: Table S3
Table S3. Low-pass resequencing of 29 genes from the candidate interval
		Resistance gene	Gene	Position Chr. 1H	Gene size (bp)/Morex CDS	Designed primer pairs	Product size (bp)/Morex genome	Product size (bp)/Morex CDS	PCR products in parents	Sequenced fragments	Size of seuenced region (bp)		SNP	InDel	presence /absence	Percent of resequneced lenght
											MBR1012	Scarlett			PCR products	in MBR1012 and Scarlett
LC
	Gene 1	No	HORVU1Hr1G000820.1	2206515-2208709	2194	2	-	761	single band in parents	2	713	713	0	0		32.49
	Gene 2	No	HORVU1Hr1G000870.1	2315379-2318239	2860	1	-	186	single band in parents	1	187	187	No SNPs; partly heterozygous	0		6.53
	Gene 3	No	HORVU1Hr1G000880.1	2321017-2321809	792	1	-	204	single band in parents	1	206	206	2	0		26.01
	Gene 4	No	HORVU1Hr1G000890.2	2322023-2323245	1222	1	-	253	multiple bands	0	-	-	0	0		0
	Gene 5	No	HORVU1Hr1G000970.1	2480502-2481189	687	1	-	371	single band in parents	1	199	199	1 SNP; only forward primer sequence	0		28.96
	Gene 6	No	HORVU1Hr1G000980.1	2508528-2508781	253	1	-	185	multiple bands	0	-	-	0	0		0
	Gene 7	No	HORVU1Hr1G001000.1	2519412-2519796	384	1	-	154	only on Scarlett	0	-	-	0	0	Dominant for Scarlett	0
	Gene 8	No	HORVU1Hr1G001010.1	2523769-2523985	216	1	-	0	No band in parents	0	-	-	0	0		0
	Gene 9	No	HORVU1Hr1G001070.1	2563416-2564658	1242	1	-	168	single band in parents	1	167	167	2	0		31.44
	Gene 10	No	HORVU1Hr1G001100.1	2608865-2611347	2482	2	-	415	single band in parents	2	402	402	2	0		16.19
	Gene 11	No	HORVU1Hr1G001110.1	2631559-2632063	504	1	-	171	single band in parents	1	114	114	2 SNPs; only forward primer sequence	0		22.61
HC
	Gene 1	Yes	HORVU1Hr1G000830.3	2237274-2244749	7475	8	5726	-	4 primers with multiple band/ 3 primers with single band in parents/ one primer only MBR1012	4	2257	2257	7	0	One primer dominant for MBR1012	30.16
	Gene 2	Yes	HORVU1Hr1G000840.1	2256321-2260574	4253	2	594	-	one primer with single band in parents/ one primer only MBR1012	1	264	264	0	0	One primer dominant for MBR1012	6.207
	Gene 3	No	HORVU1Hr1G000850.2	2288429-2288693	264	1	-	164	single band in parents	1	162	162	No SNPs; partly heterozygous	0		61.36
	Gene 4	Yes	HORVU1Hr1G000860.7	2302070-2309447	7377	7	5531	-	6 primers with single band in parents/ one primer with smear	7	4629	4629	9	0		62.74
	Gene 5	Yes	HORVU1Hr1G000900.5	2323680-2330056	6376	10	7520	-	5 primers with single band in parents/ 3 primers with multiple bands/one primer only MBR1012/one primer only Scarlett	6	3643	3308	Many SNPs	35 Indels with 1 to three bp/ large deletion in Scarlett	One primer dominant for MBR1012/one primer dominant for MBR1012	57.13
	Gene 6	Yes	HORVU1Hr1G000910.9	2362586-2367013	4427	8	5313	-	4 primers with single band in parents/ 3 primers with multiple bands	6	1629	1629	0	0		36.79
	Gene 7	No	HORVU1Hr1G000920.2	2415651-2417084	1433	1	-	323	single band in parents	1	325	325	3	0		22.67
	Gene 8	No	HORVU1Hr1G000930.1	2429752-2430871	1119	1	-	268	single band in parents	1	270	270	7	0		24.12
	Gene 9	No	HORVU1Hr1G000940.3	2471775-2475305	3530	1	-	371	multiple bands	0	-	-	0	0		0
	Gene 10	No	HORVU1Hr1G000960.10	2477273-2481215	3942	1	-	376	single band in parents	1	726	729	6	3 Indels		18.49
	Gene 11	No	HORVU1Hr1G001020.1	2524728-2525648	920	1	-	381	single band in parents	1	360	360	0	0		39.13
	Gene 12	No	HORVU1Hr1G001030.1	2532014-2532317	303	1	-	154	week band	0	-	-	0	0		0
	Gene 13	No	HORVU1Hr1G001040.1	2534715-2535433	718	1	-	266	single band in parents	1	269	269	3	0		37.46
	Gene 14	No	HORVU1Hr1G001050.1	2551018-2551266	248	1	-	108	multiple bands	0	-	-	0	0		0
	Gene 15	No	HORVU1Hr1G001060.1	2558952-2560347	1395	1	-	308	single band in parents	1	438	626	4	188bp deletion in MBR1012		44.87
	Gene 16	No	HORVU1Hr1G001080.1	2578526-2578814	288	1	-	149	single band in parents	1	147	147	3	0		51.04
	Gene 17	No	HORVU1Hr1G001090.1	2585277-2589625	4348	1	-	352	multiple bands	0	-	-	0	0		0
	Gene 18	No	HORVU1Hr1G001120.2	2649700-2763382	113682	1	-	342	multiple bands	0	-	-	0	0		0
Total					174934	61	24684	6430			17107	16963				9.88
